# Supplementary material for: Thermally reduced graphene oxide films as flexible lateral heat spreaders
Source: Royal Society of Chemistry journal article supplement (doi:10.1039/c4ta02693d), 2014-07-15
Supplement: c4ta02693d1.pdf [file c4ta02693d1.pdf]

## Supplementary Information

### Thermally reduced graphene oxide films as flexible lateral heat spreaders

Ning-Jing Song<sup>1,3</sup>, Cheng-Meng Chen<sup>2,\*</sup>, Chunxiang Lu<sup>1,\*</sup>, Zhuo Liu<sup>2</sup>,

Qing-Qiang Kong<sup>2</sup>, Rong Cai<sup>2</sup>

<sup>1</sup> National Engineering Laboratory for Carbon Fiber Technology, Institute of Coal Chemistry, Chinese Academy of Sciences, Taiyuan 030001, China

<sup>2</sup> Key Laboratory of Carbon Materials, Institute of Coal Chemistry, Chinese Academy of Sciences, Taiyuan 030001, China

<sup>3</sup> University of Chinese Academy of Sciences, Beijing 100049, China

### Experimental

The details of the measurement technique and indicate the accuracy of the measurements:

The measurement of thermal diffusivity and specific heat capacity ( $C_p$ ) refers to the reference<sup>[1]</sup>

The thermal diffusivity was determined using Laser Flash Apparatus (NETZSCH LFA 447 *NanoFlash*) operated at room temperature in a vacuum of 0.01 Pa. In this method, the test sample was cut into round shape with diameter of 25.4 mm, as the sample carrier is standard with fixed size. Then, the sample was heated at center by light pulse, with the resulting temperature rise at four different positions being

---

\* Corresponding authors. E-mail: [lucx@sxicc.ac.cn](mailto:lucx@sxicc.ac.cn) (Chunxiang Lu), E-mail: [ccm@sxicc.ac.cn](mailto:ccm@sxicc.ac.cn) (Cheng-Meng Chen)

measured using infrared detector. The thermal diffusivity is determined by analyzing the temperature-versus-time curve based on the following equation:

$$\alpha = 0.1388 \cdot h^2 \cdot t^{-1/2} \quad (1)$$

$\alpha$  is the thermal diffusivity,  $h$  is the thickness of the tested sample and  $t$  is the diffusion time. Finally, the thermal conductivity ( $K$ ) was calculated using the Equation (2):

$$K = \alpha \cdot C_p \cdot \rho \quad (2)$$

Herein,  $\rho$  is the density of the graphene film, and  $C_p$  is the specific heat capacity obtained by differential scanning calorimetry (DSC, NETZSCH DSC 200 F3 Maia). The density ( $\rho$ ) in Equation (2) is obtained according to  $\rho = m/V$ , among which,  $m$  and  $V$  are the mass and volume of the sample, respectively. The mass was available by weighing the round sample with a diameter of 25.4 mm using electronic precision balance. The volume was determined by the products of flake area and thickness of the sample. The thickness was measured by SEM.

The specific heat capacity ( $C_p$ ) was measured by DSC. The measurement was conducted using sapphire method according to Equation (3):

$$\frac{DSC_{\text{sample}} - DSC_{\text{bas}}}{DSC_{\text{standard}} - DSC_{\text{bas}}} = \frac{C_{p\text{sample}} \cdot m_{\text{sample}}}{C_{p\text{standard}} \cdot m_{\text{standard}}} \quad (3)$$

$DSC_{\text{sample}}$ ,  $DSC_{\text{bas}}$ ,  $DSC_{\text{standard}}$  are the ordinate of the DSC curves corresponding to the sample, blank specimen, and standard specimen, respectively.  $C_{p\text{sample}}$  and  $C_{p\text{standard}}$  are the specific heat of the sample and standard specimen, respectively.  $m_{\text{sample}}$  and  $m_{\text{standard}}$  are the mass of the sample and sapphire, respectively.

Three tests including blank test, sapphire test, and sample test were carried out in

turn. Firstly, the base curve of DSC was achieved by the blank test. The sapphire was selected as reference sample with known  $C_p$ . Then the DSC curves, heat enthalpy change rate  $dH/dt$  as a function of time  $t$ , of the sample and sapphire were calibrated with the base curve. Comparing the DSC signal of sample with that of sapphire,  $c_p$  of the being tested sample can be calculated based on Equation (3).

The accuracy of  $K$  was affected most possibly by the thickness of the film, so the thickness was measured by SEM and the samples used for SEM measurement were obtained from the different location in the film, 10 samples were cut from each film, and the final thickness was the mean value of 10 samples.

Static mechanical uniaxial in-plane tensile tests were performed with dynamic mechanical analyzer (2980 DMA, TA instruments). The films were cut with a razor in rectangular strips of approximately 6mm\*15mm. the sample were gripped using film tension clamps with a strain rate of 0.02%/min and preload force of 0.001 N.

## Results and discussion

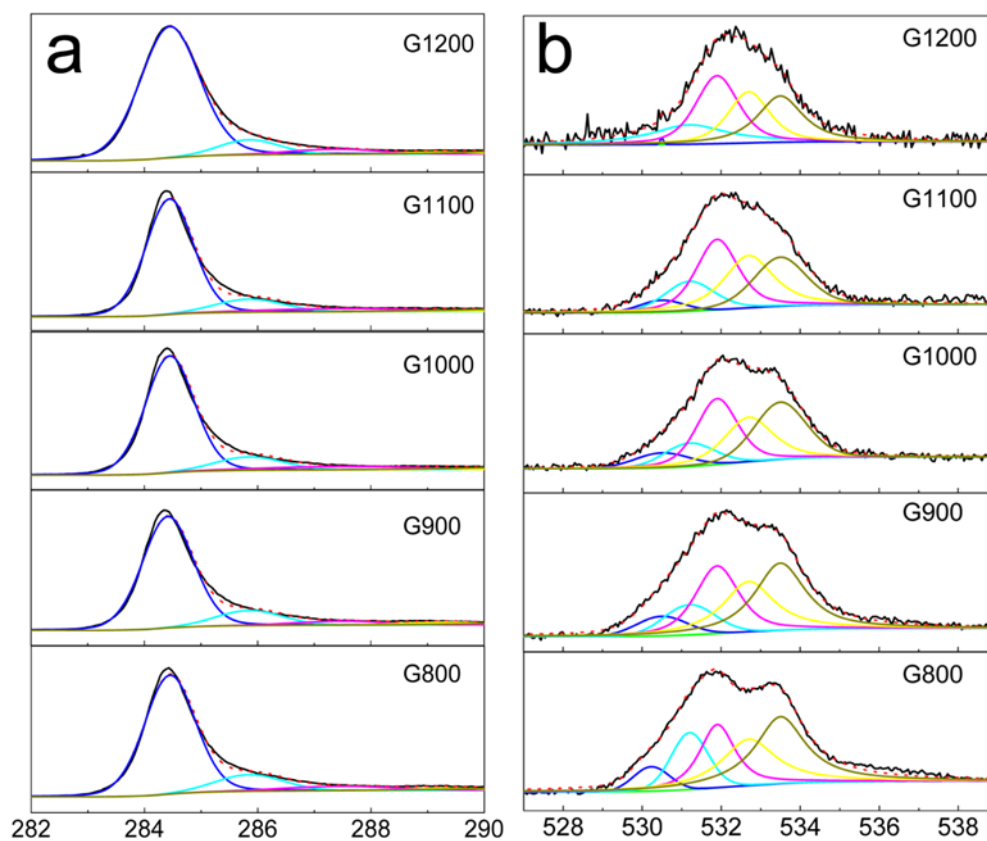

Fig. S1 C1s (a) and O1s (b) fine scan spectrum of film samples

**Table S1** Thermal properties of graphene related materials and composites with graphene

| Ref. | Material                                             | Thermal Conductivity ( $\text{Wm}^{-1}\text{K}^{-1}$ )(300K)                                                                     | Preparation Method                                                                                                                                               | Measurement Method                                      |
|------|------------------------------------------------------|----------------------------------------------------------------------------------------------------------------------------------|------------------------------------------------------------------------------------------------------------------------------------------------------------------|---------------------------------------------------------|
| [7]  | Graphene-Multilayer Graphene Nano-composites         | $\sim 5.1 \text{ Wm}^{-1}\text{K}^{-1}$ at the filler loading fraction $f = 10 \text{ vol. \%}$ .                                | Graphene-Multilayer Graphene Nano-composites was prepared by adding epoxy resin to the graphene-multilayer graphene suspension followed by heating and degassing | transient “laser flash” technique                       |
| [8]  | the hybrid graphene - FLG - silver - epoxy composite | $\sim 9.9 \text{ Wm}^{-1}\text{K}^{-1}$ at the small 5 vol.% of the graphene-FLG loading                                         | Dispersing the graphene solution in the silver epoxy, and applying the high-shear mixing followed by ultra - sonication                                          | transient planar source technique                       |
| [13] | Graphene – Copper - Graphene Films                   | $370 \text{ Wm}^{-1}\text{K}^{-1}$                                                                                               | Chemical vapor deposition of a single atomic plane of graphene on both sides of $9 \mu\text{m}$ thick Cu films                                                   | “laser flash” method                                    |
| [14] | GaN devices with graphene quilts                     | The temperature of the hotspots can be lowered by $\sim 20^\circ\text{C}$ in transistors operating at $\sim 13 \text{ Wmm}^{-1}$ | Transfer FLG films on top of AlGaN/GaN devices                                                                                                                   | micro-Raman spectroscopy with <i>in situ</i> monitoring |

## Reference

- [1] Q. Q. Kong, Z. Liu, J. G. Gao, C. M. Chen, Q. Zhang, G. Zhou, Z. C. Tao, X. H. Zhang, M. Z. Wang and F. Li, *Advanced Functional Materials*, 2014, DOI: 10.1002/adfm.201304144.
- [7] K. M. Shahil and A. A. Balandin, *Nano Letters*, 2012, **12**, 861-867.
- [8] V. Goyal and A. A. Balandin, *Applied Physics Letters*, 2012, **100**, 073113.
- [13] P. Goli, H. Ning, X. Li, C. Y. Lu, K. S. Novoselov and A. A. Balandin, *Nano Letters*, 2014,

**14**, 1497-1503.

- [14] Z. Yan, G. Liu, J. M. Khan and A. A. Balandin, *Nature Communications*, 2012, **3**, 827.
